# Supplementary material
Source: PubMed Central journal article supplement (PMC6097927)
Supplement: NIHMS970112-supplement-1.pdf [file NIHMS970112-supplement-1.pdf]

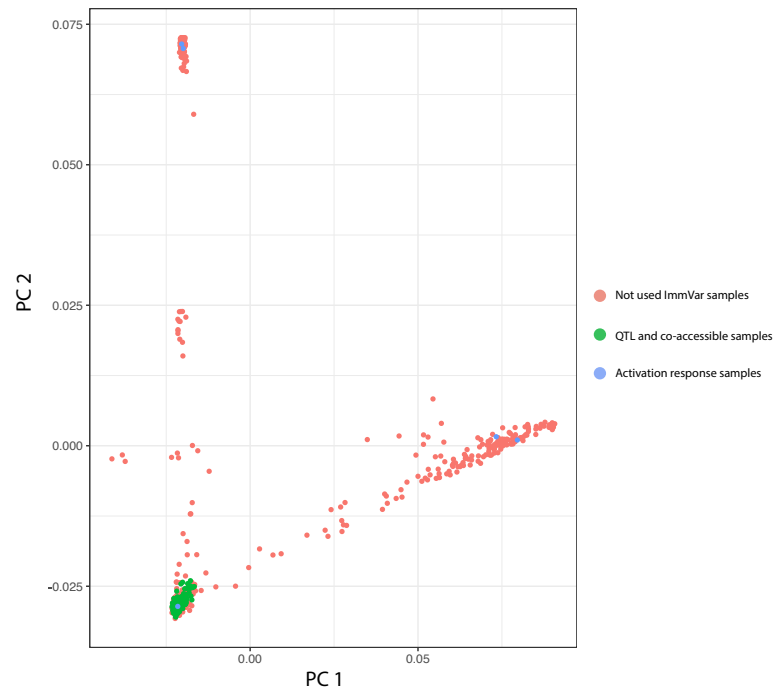

**Supplementary Figure 1. PCA of the genetic relationships between individuals in the ImmVar cohort.** Shown are the scores for each of 688 individuals in the ImmVar Consortium along the first two principal components (PCs, x and y-axes) in a PCA of the genetic relationship matrix. Individuals used in this study are highlighted in blue (activation response analysis) and green (QTL and co-accessibility analyses).

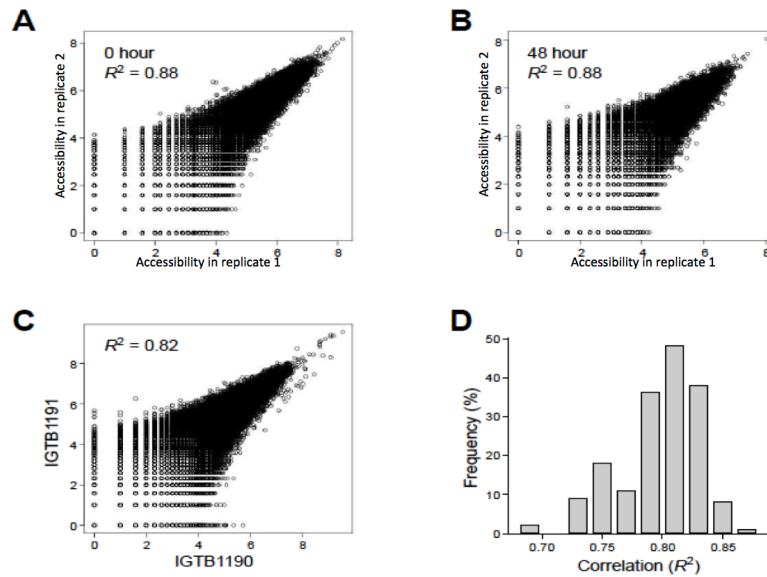

**Supplementary Figure 2. ATAC-seq reproducibility.** (a, b) Technical reproducibility. Scatter plots of chromatin accessibility (ATAC-seq signal, x and y-axes) for two replicate experiments of either unstimulated (a; 36,486 Th peaks) or activated (b; 52,154 Th<sub>stim</sub> peaks) T cells. (c, d) Reproducibility between individuals. (c) Chromatin accessibility for activated T cells from individuals IGTB1191 (y-axis) and IGTB1190 (x-axis) (d) and histogram of correlations between every pairs of individuals for the 52,154 Th<sub>stim</sub> peaks.

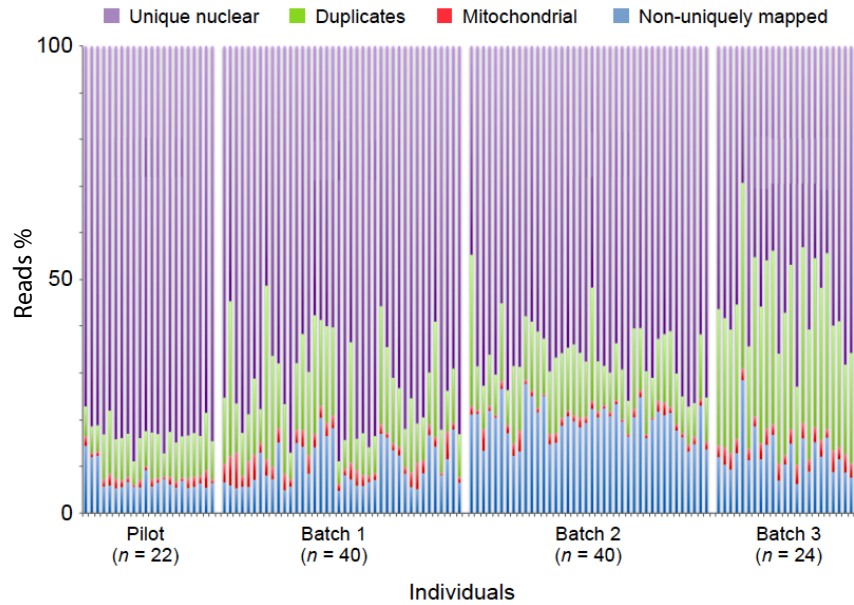

**Supplementary Figure 3. ATAC-seq alignment rates.** Each sample's (x-axis) percentage of reads (y-axis) that are non-uniquely mapped (blue), uniquely mitochondrial DNA (red), uniquely nuclear genomic duplicates (green), and uniquely nuclear genomic non-duplicates (purple).

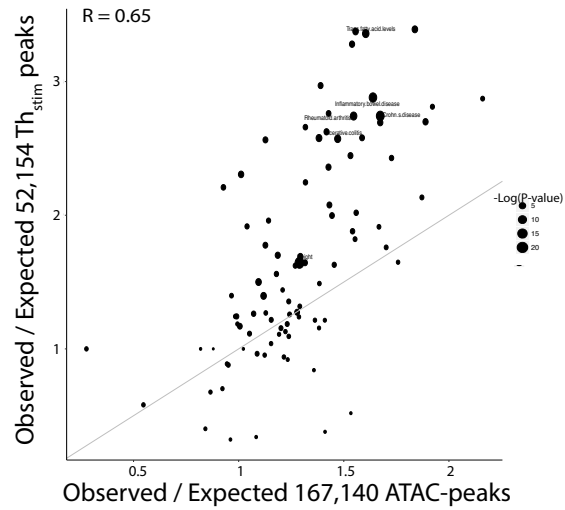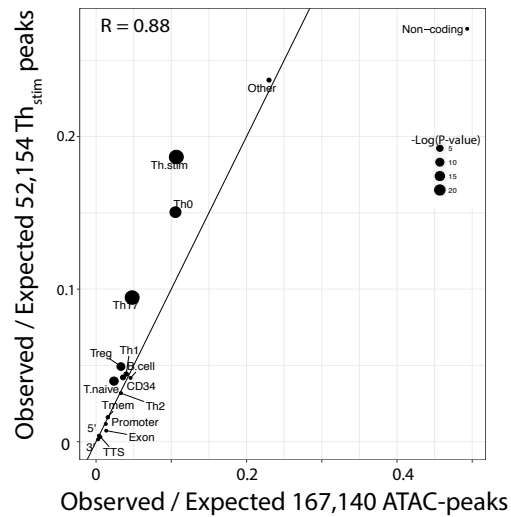

**Supplementary Figure 4. Comparison of peak annotations in activated CD4<sup>+</sup> T cells.** For each set of GWAS loci (a) or enhancer (H3k27Ac marks, b) features, shown is their observed over expected enrichment of proportions in 52,154 Th<sub>stim</sub> peaks called from pooling five individuals (y-axis; as in **Fig. 1**) or in 167,140 ATAC-peaks called from 105 individuals (x-axis, as in **Fig. 2**). Point size is scaled to associated significance (hypergeometric *P*-value).



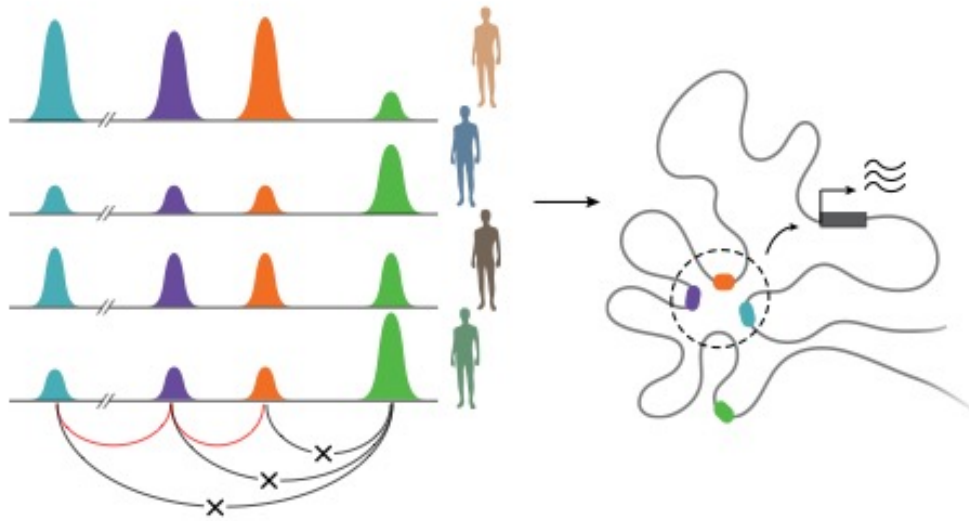

**Supplementary Figure 5. Cartoon of co-accessible regions of accessible chromatin.** Cartoon of the multiscale relationship between co-accessible regions across individuals and 3D genome structure.

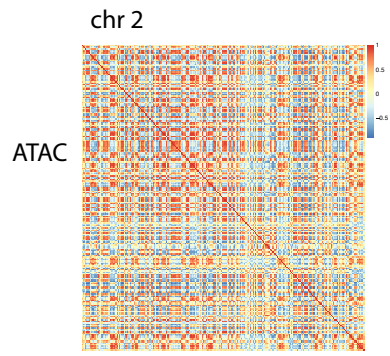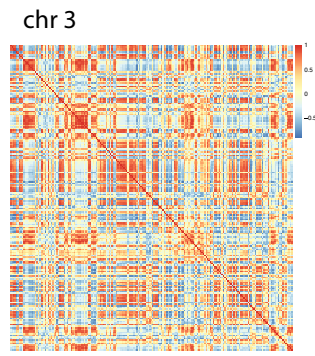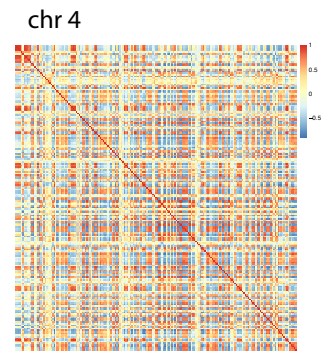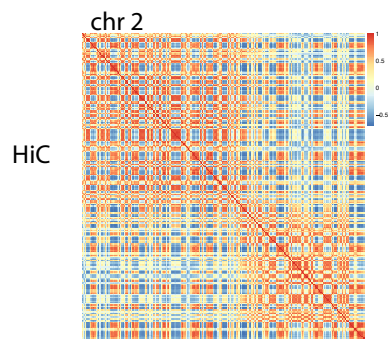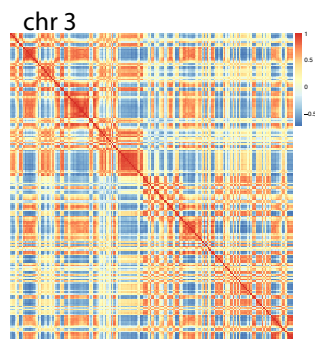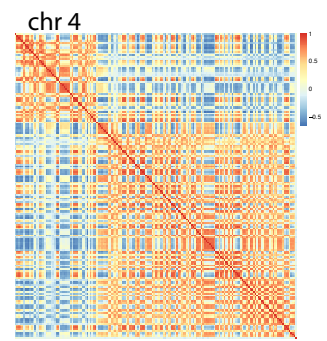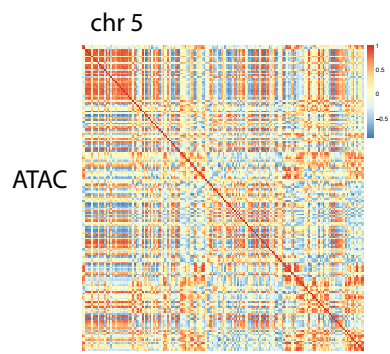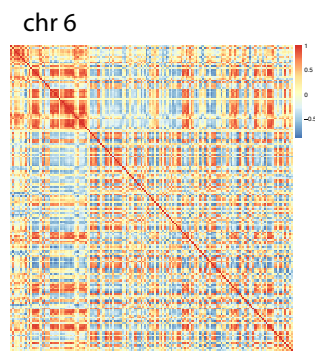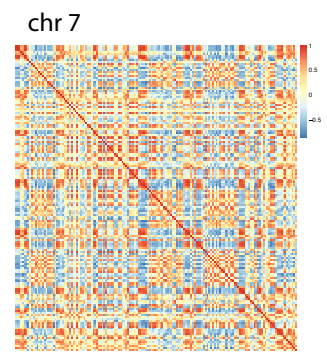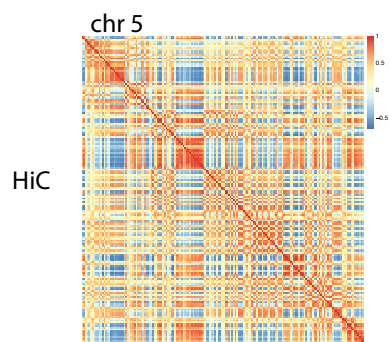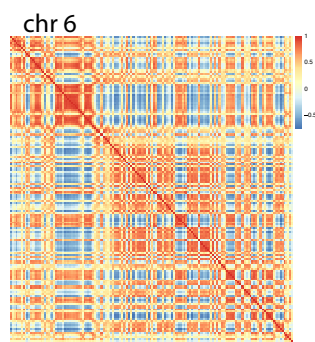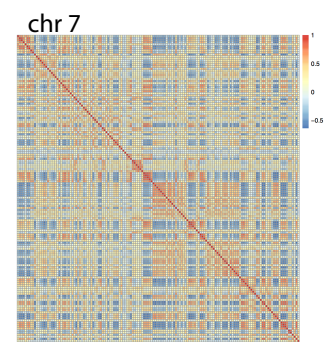

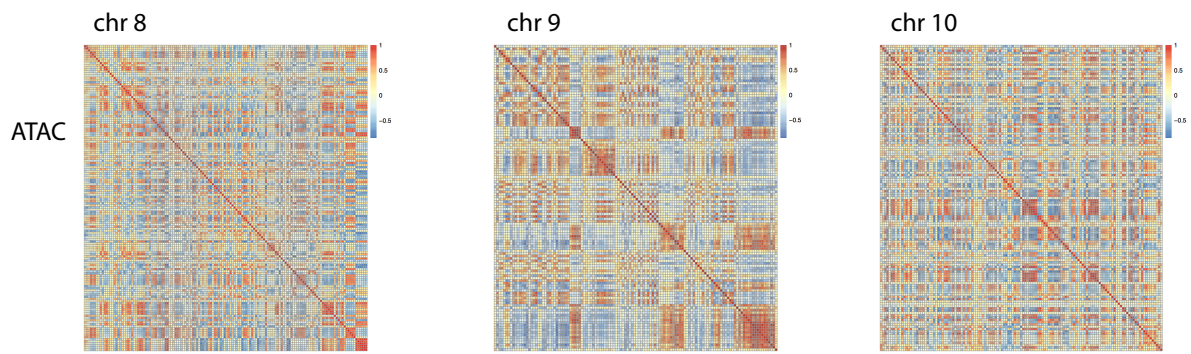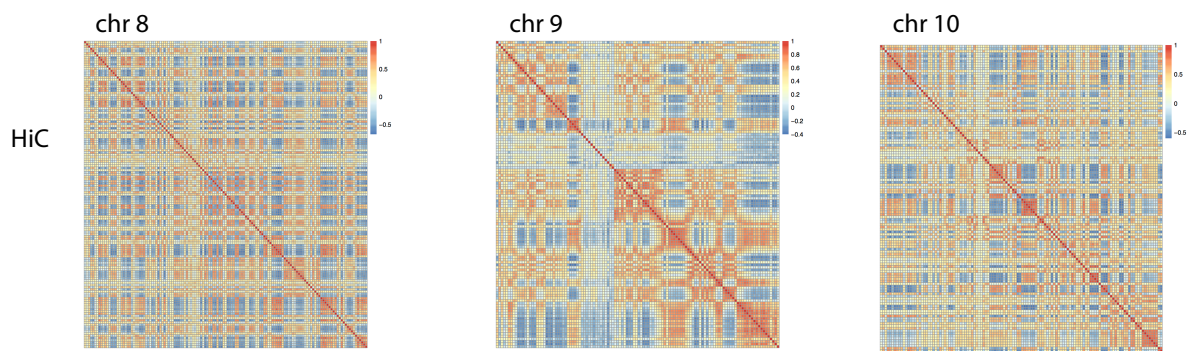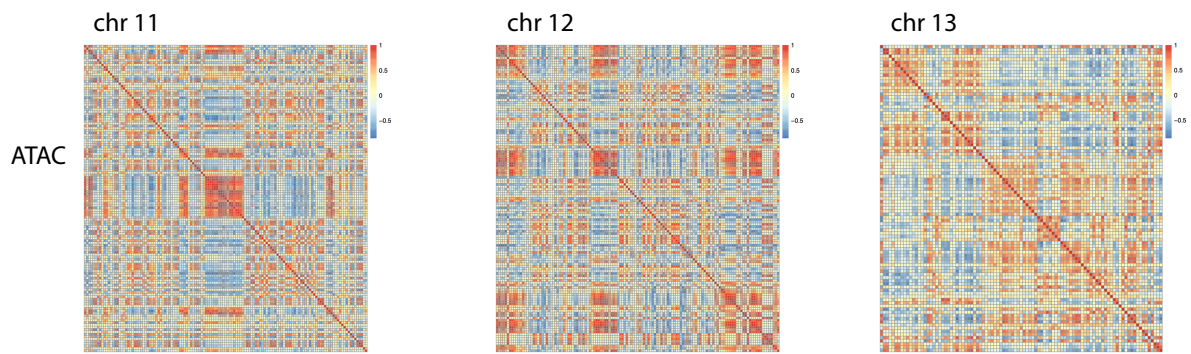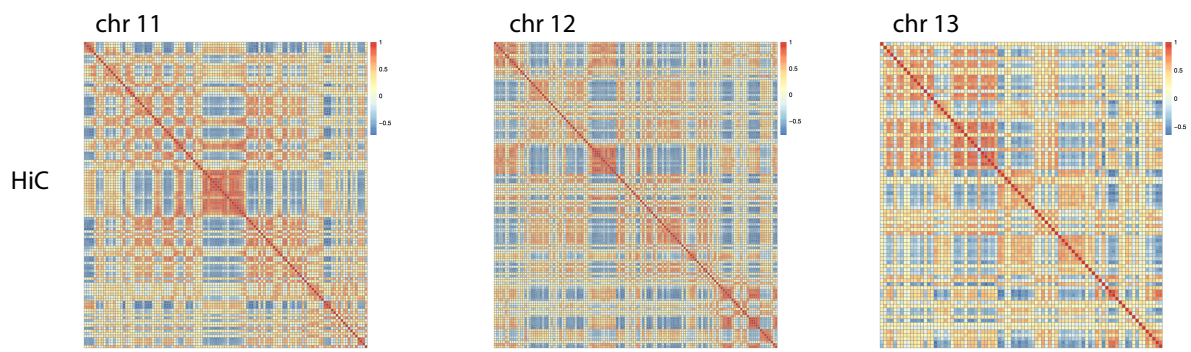



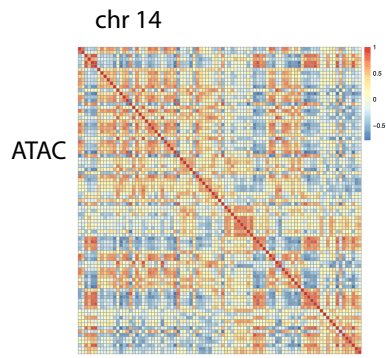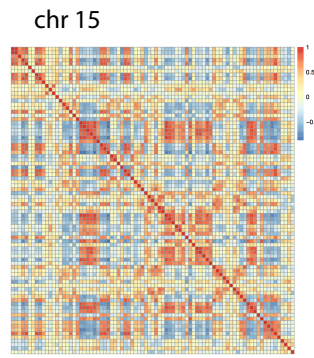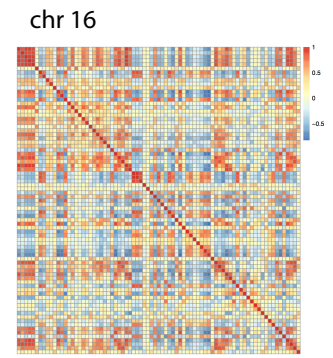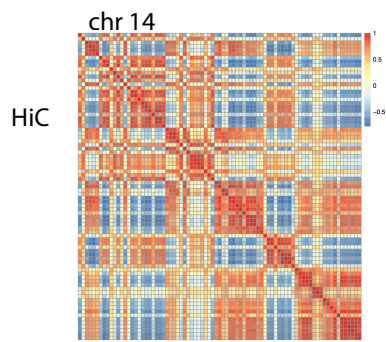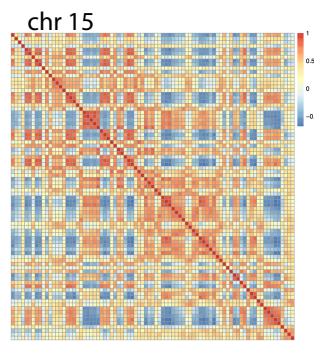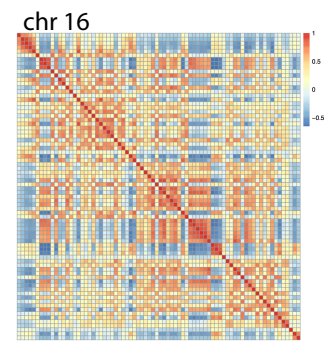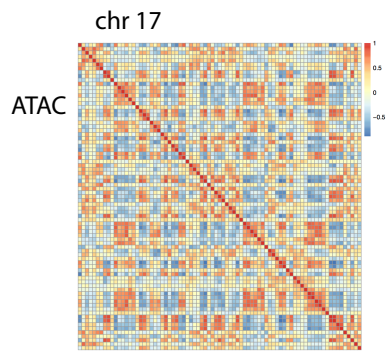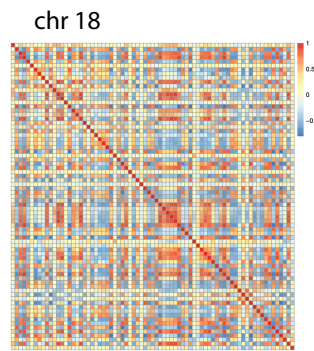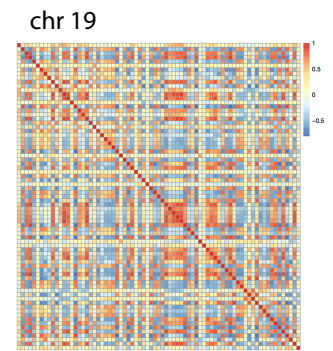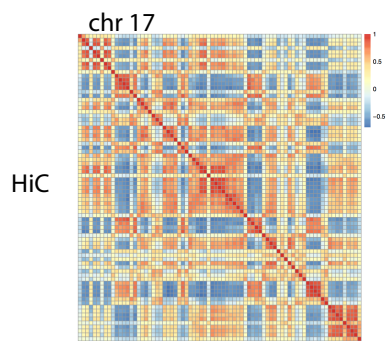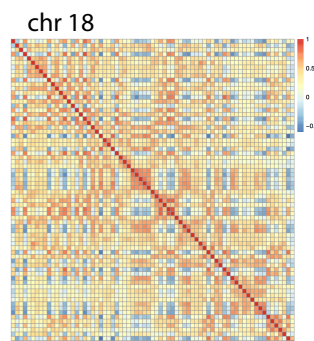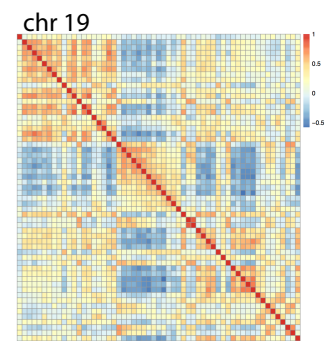

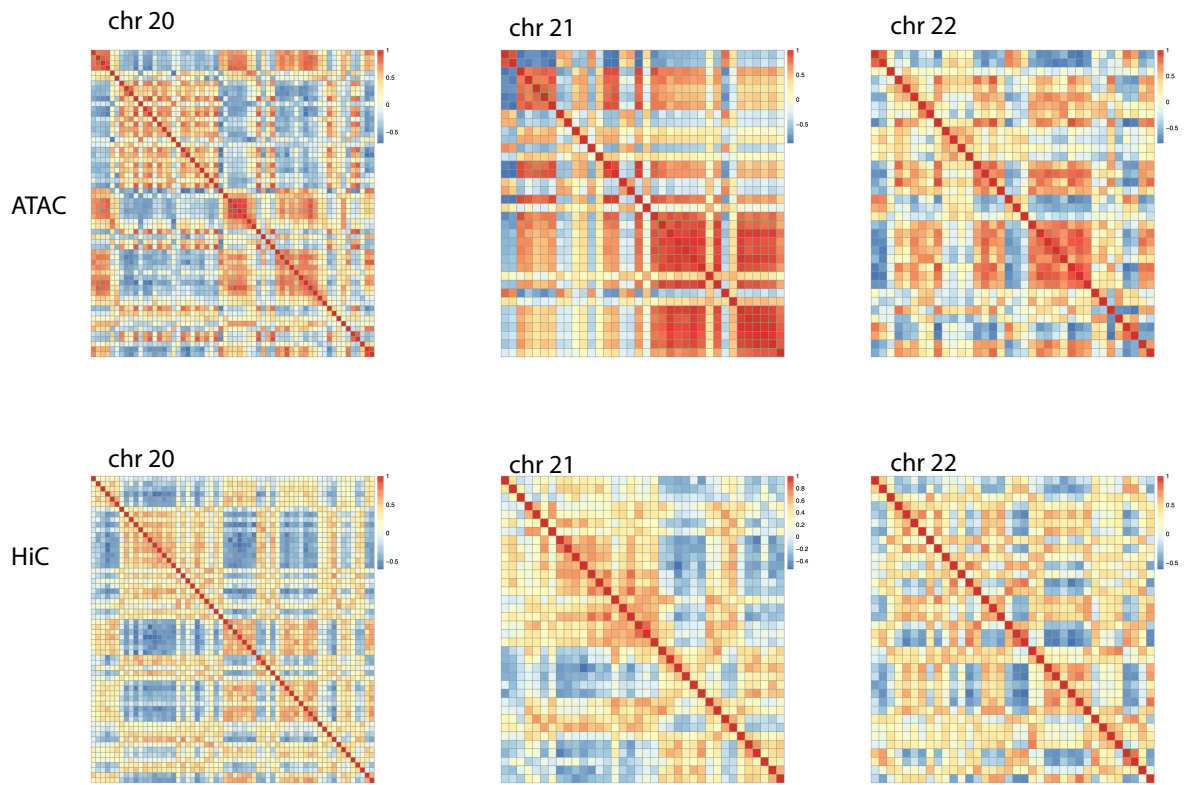

**Supplementary Figure 6. Megabase scale inter-individual co-accessibility (by ATAC-peak) or physical interactions (by Hi-C).** For each chromosome matching heat maps show the pairwise Pearson correlation in chromatin accessibility across 105 ATAC-seq profiles in ATAC-peaks binned into 1 Mb windows (top panel) and correlation of Hi-C interactions at 1 Mb resolution (bottom panel).

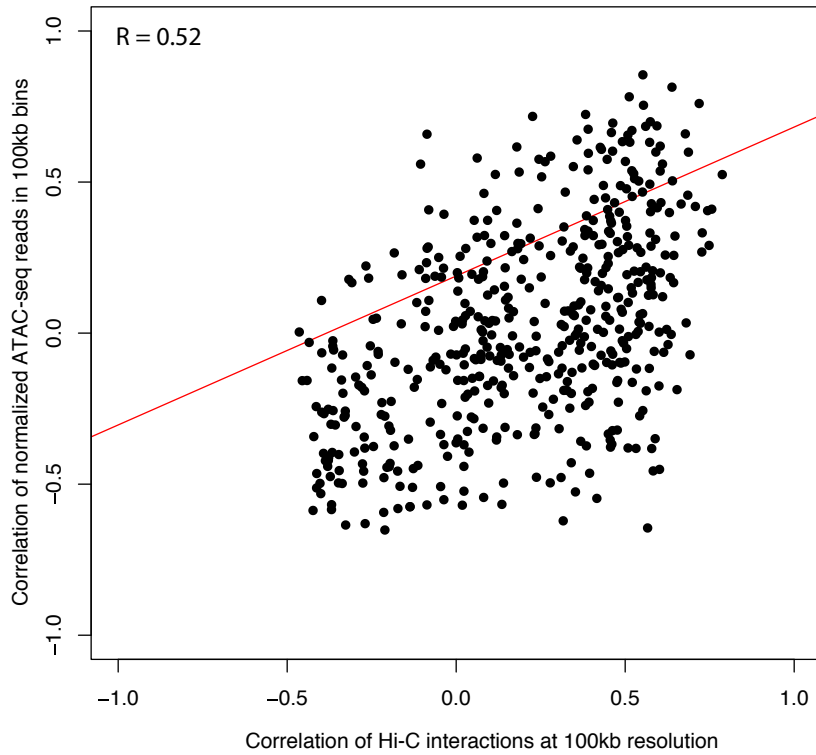

**Supplementary Figure 7. Comparison of co-accessibility and Hi-C interactions.**

For each pair of 100 kb windows (shown are 500 randomly sampled pairs) along chromosome 22 are the Hi-C interaction score (x-axis) and the correlation between ATAC-peaks (y-axis) (Pearson  $R = 0.52$ ).

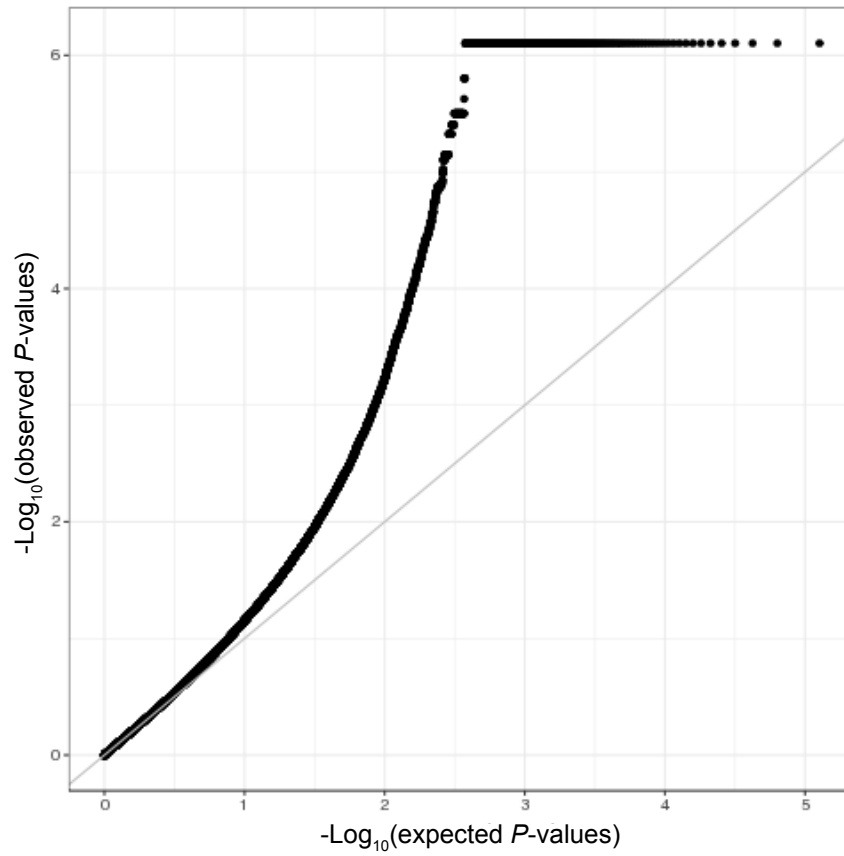

**Supplementary Figure 8. Co-accessible peaks.** Q-Q plot for all tests of correlation between co-accessible peaks within 1.5 Mb region around a target ATAC-peak.

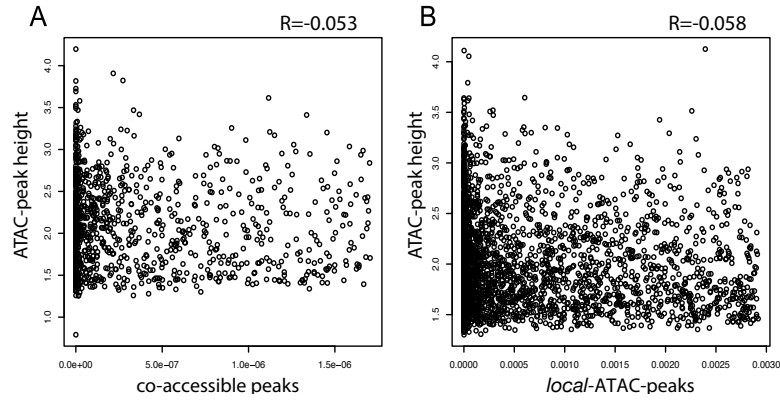

**Supplementary Figure 9. Relation of ATAC-peak height and statistical significance of *local*-ATAC-peaks and co-accessible peaks.** Relationship between ATAC-peak height (y-axis) and statistical significance (x-axis) of co-accessible peaks (a) and *local*-ATAC-peaks (b). Pearson R is marked on top, showing little relationship between the significance of local-association or co-accessibility and the strength of the peak.



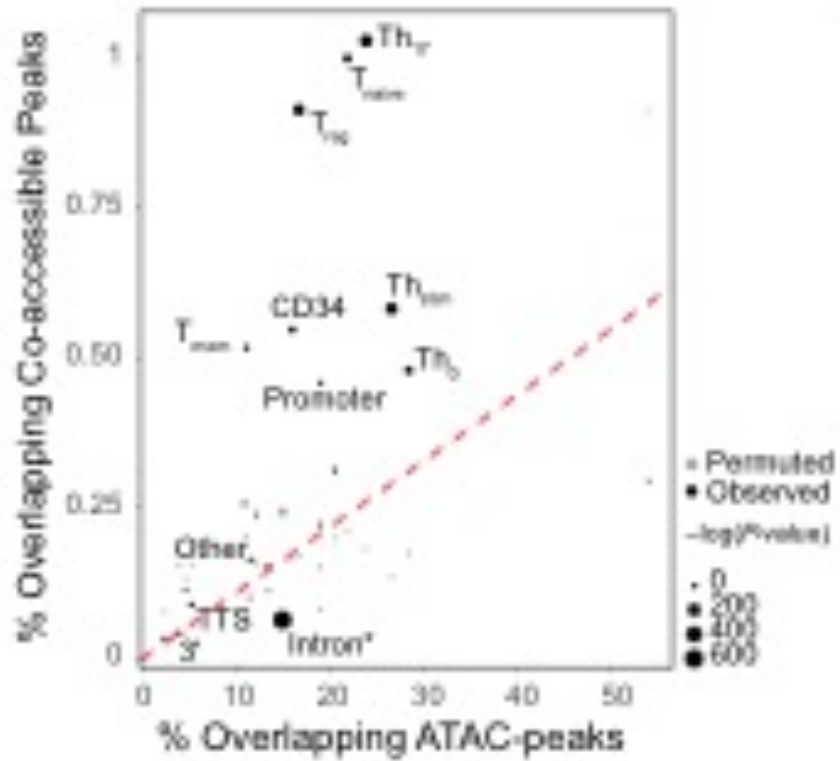

**Supplementary Figure 10. Co-accessible peak overlap with Th cell enhancers.** Percentages of enhancer annotations overlapping all ATAC-peaks (x-axis) vs. co-accessible peaks (y-axis). Real peaks (black) and permuted peaks (gray).

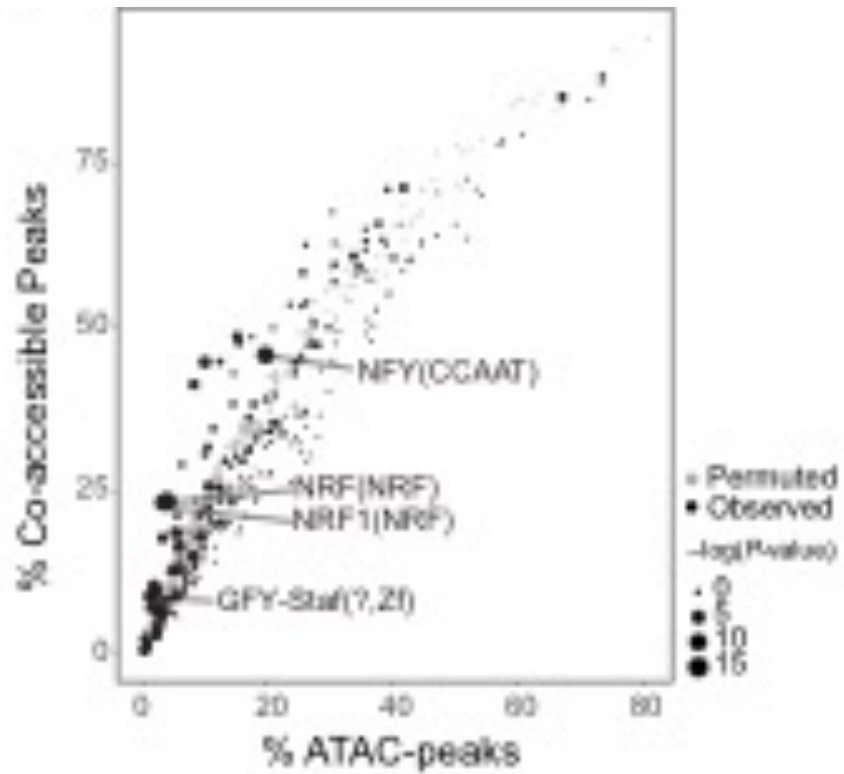

**Supplementary Figure 11. Co-accessible peak TF motif enrichment.** Percentage of ATAC-peaks (x-axis) vs. percentage of co-accessible peaks (y-axis) overlapping TF binding sites. Real peaks (black) and permuted peaks (gray).

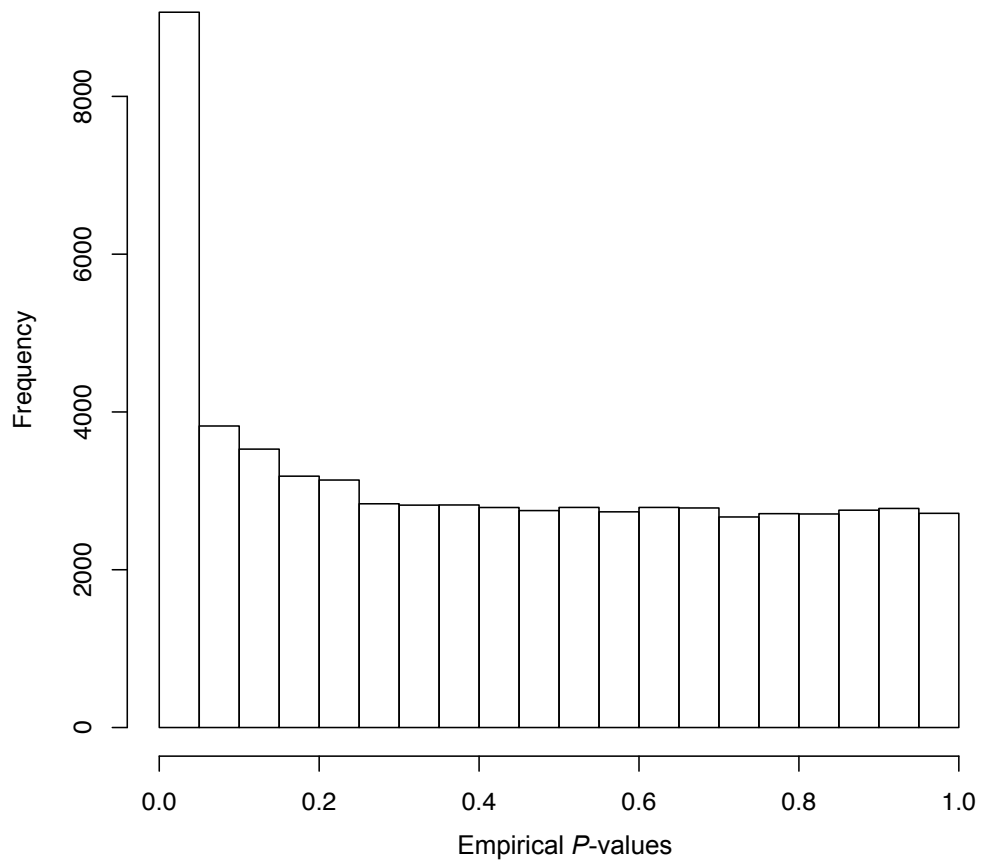

**Supplementary Figure 12. Local-ATAC-QTL  $P$ -values.** Distribution of the empirical  $P$ -values for the minimum statistical association per ATAC-peak containing a SNP.

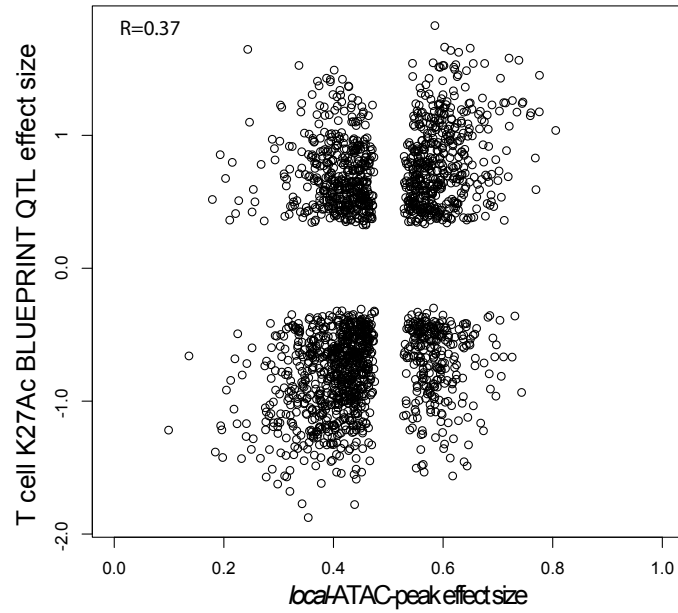

**Supplementary Figure 13. Correlation to K27Ac QTLs identified in immune cells in the BLUEPRINT epigenome project.** For each of 2,015 loci identified as both T cell K27Ac histone mark QTLs in the BLUEPRINT epigenome project ( $I$ ) and as ATAC-QTLs in our analysis shown are their original effect sizes (y-axis) and the corresponding effect sizes by our *local*-ATAC-QTL analysis (x-axis).

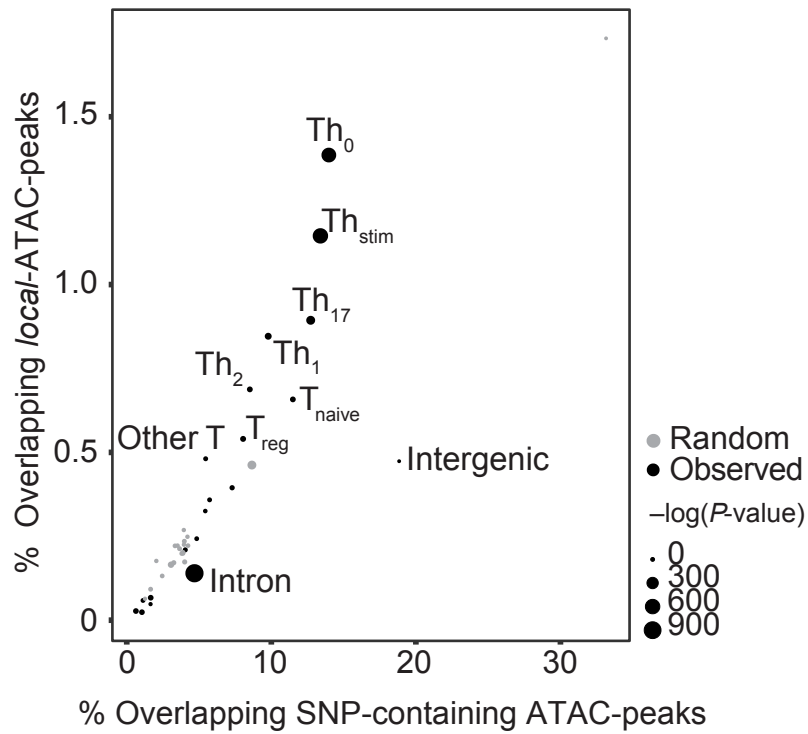

**Supplementary Figure 14. Overlap of *local*-ATAC-peaks with T cell enhancers.** Percentage of annotations overlapping SNP-containing ATAC-peaks (x-axis) vs. *local*-ATAC-peaks (y-axis). Real peaks (black) and permuted peaks (gray).

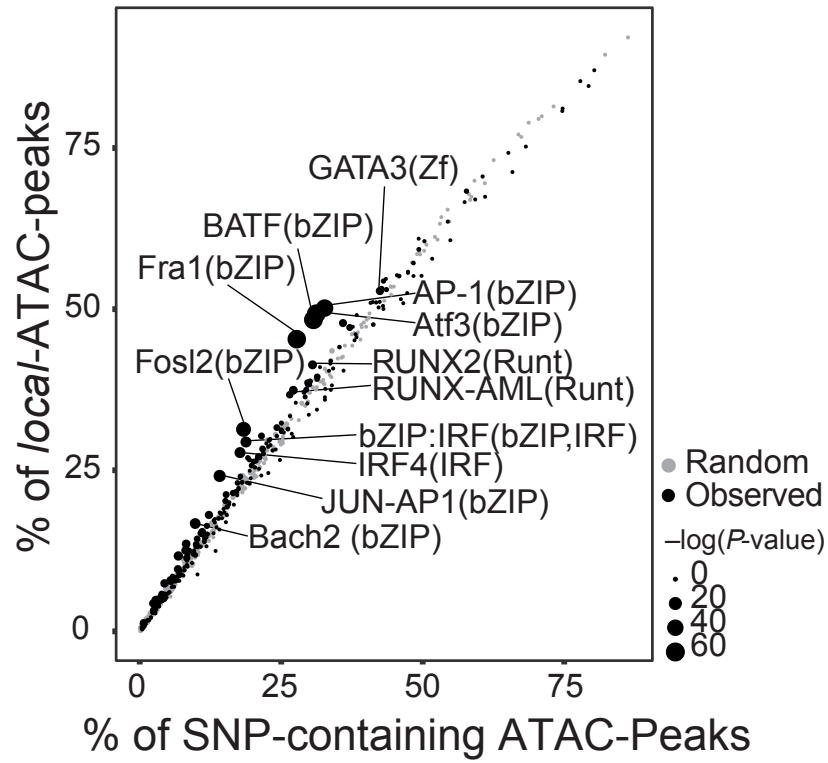

**Supplementary Figure 15. TF motif enrichment of *local*-ATAC-peaks.** Percentage of SNP-containing ATAC-peaks (x-axis) vs. percentage of *local*-ATAC-peaks (y-axis) overlapping each TF motif. Real peaks (black) and permuted peaks (gray).

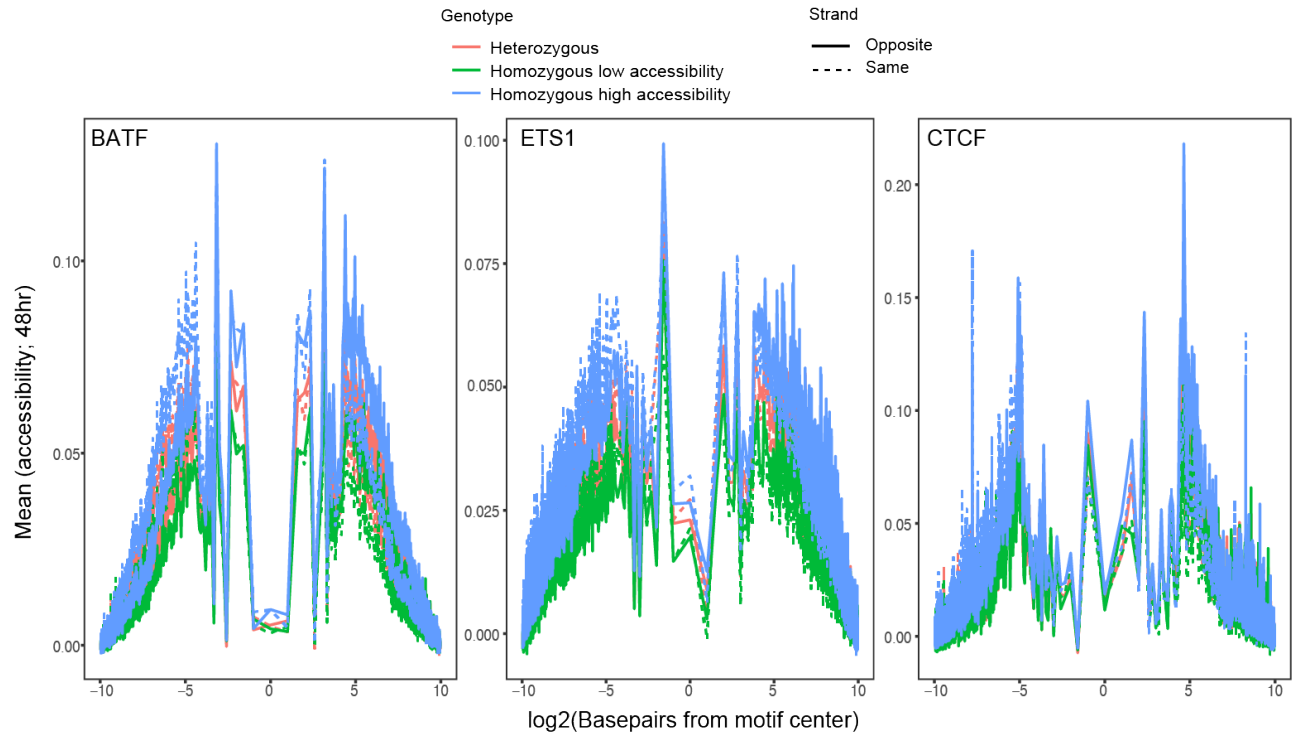

**Supplementary Figure 16. Control for TF allele specific footprinting with *local*-ATAC-peaks.** Aggregated chromatin accessibility (mean ATAC-seq signal, y-axis) in *local*-ATAC-peaks around BATF, ETS1, and CTCF binding sites previously identified by ChIP-seq (2) for the heterozygote (pink), homozygous with high ATAC-seq signal (blue) and homozygous with low ATAC-seq signal (green). Strand with the motif in dotted lines and the complementary strand with the motif in solid lines.

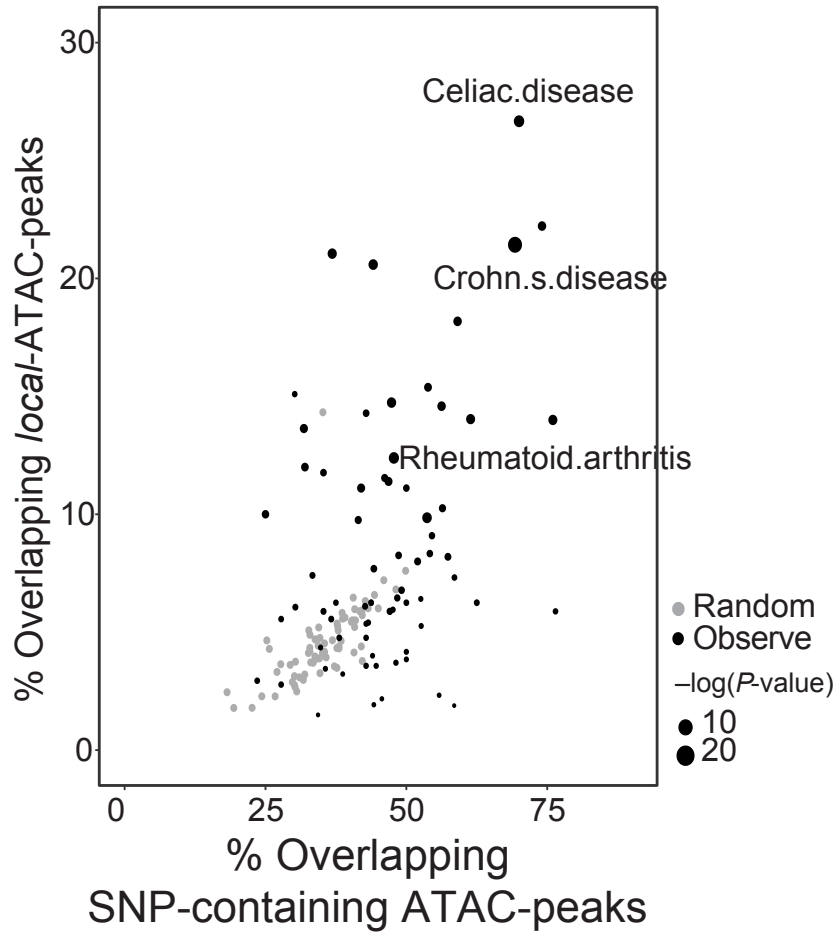

**Supplementary Figure 17. Overlap of *local*-ATAC-peaks with GWAS loci.** Percentages of GWAS loci overlapping with SNP-containing ATAC-peaks (x-axis) vs. *local*-ATAC-peaks (y-axis). Real peaks (black) and permuted peaks (gray).



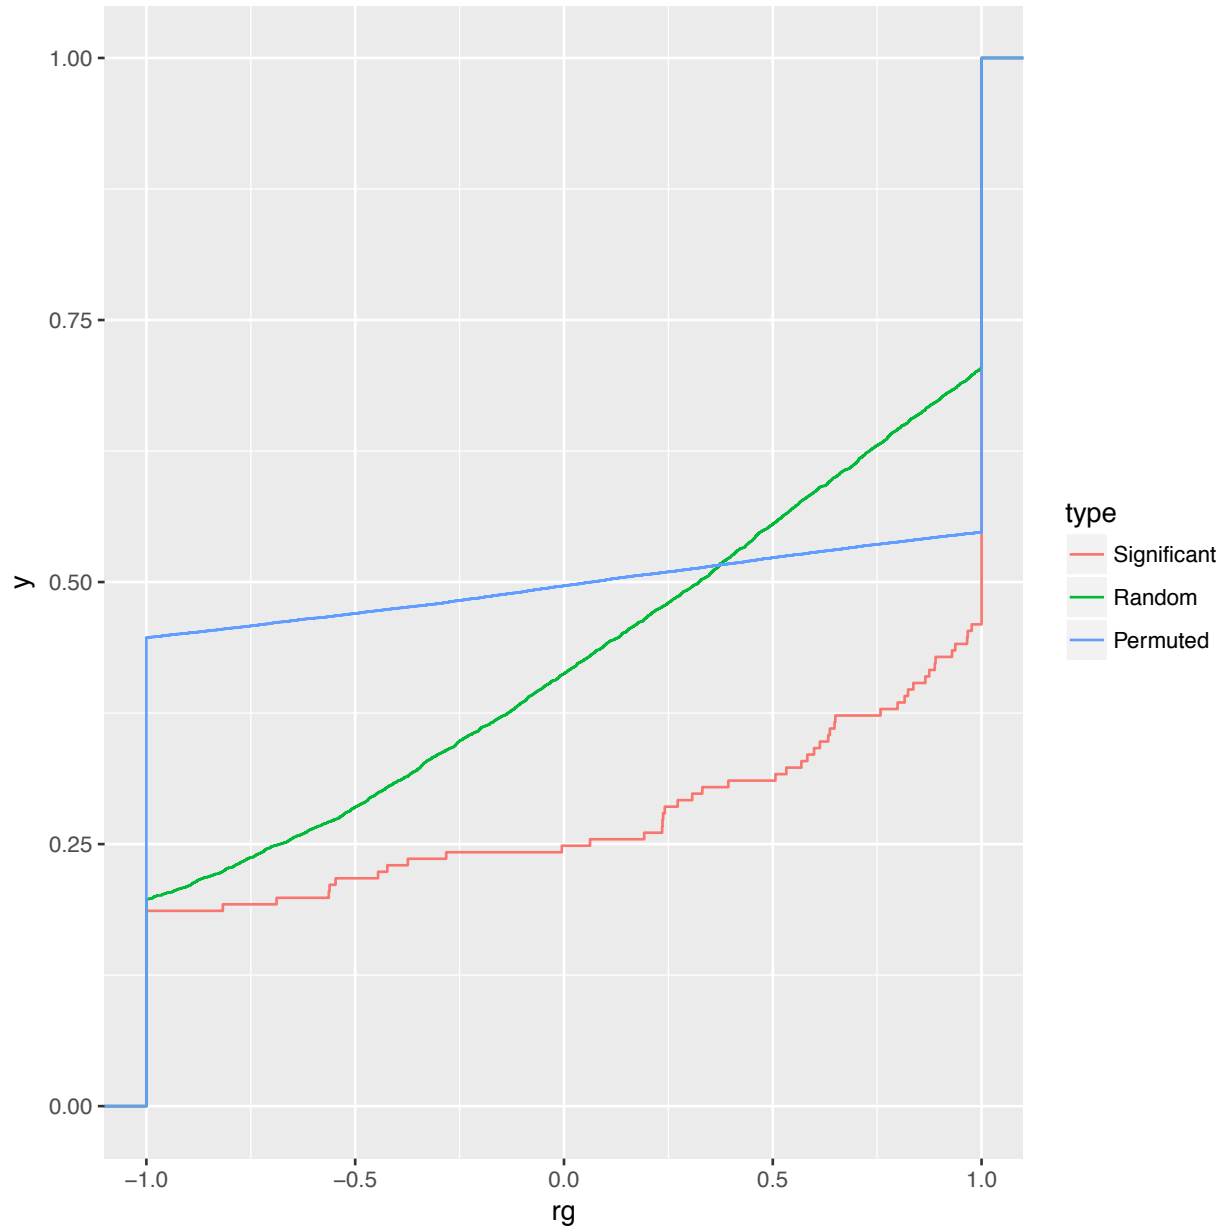

**Supplementary Figure 18. Cumulative Distribution Function of genetic correlation.** Colored by significant (red), randomly sampled (green) or permuted (blue) pairs of *local*-ATAC-peaks.

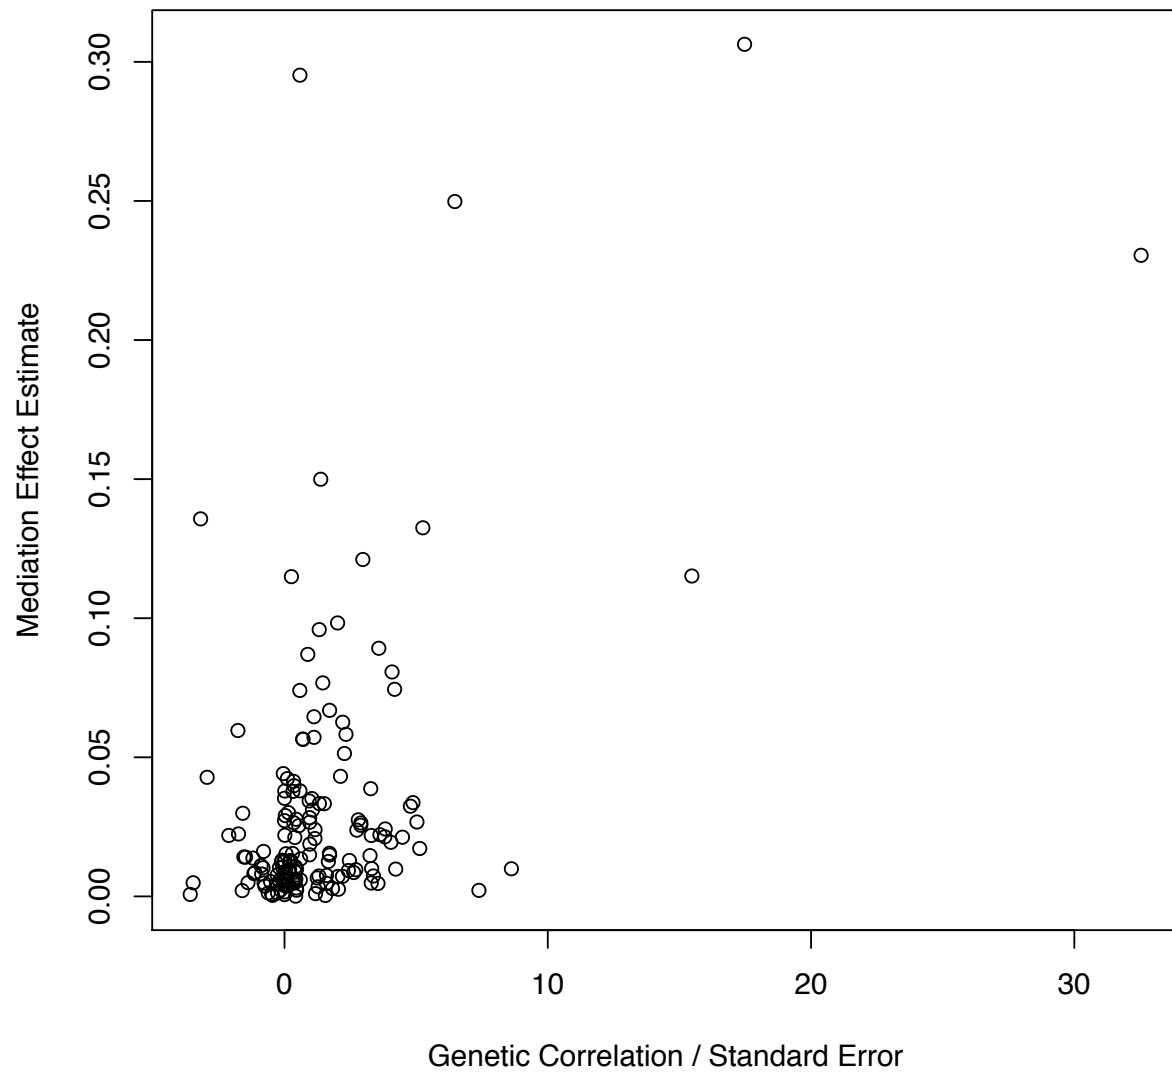

**Supplementary Figure 19. Genetic correlation vs. Mediation Effect Estimate.** Genetic correlation (weighted by the standard error) (x-axis) vs. the mediation effect estimate (y-axis) for 161 pairs of *local*-ATAC-peaks and eGenes that converged.

References:

1. L. Chen *et al.*, Genetic Drivers of Epigenetic and Transcriptional Variation in Human Immune Cells. *Cell* **167**, 1398-1414 e1324 (2016).
2. P. Kheradpour, M. Kellis, Systematic discovery and characterization of regulatory motifs in ENCODE TF binding experiments. *Nucleic Acids Res* **42**, 2976-2987 (2014).
